# Supplementary material for: Comparative Structure-Based Virtual Screening Utilizing Optimized AlphaFold Model Identifies Selective HDAC11 Inhibitor
Source: MDPI journal article supplement (doi:10.3390/ijms25021358), 2024-01-22
Supplement: s1 [file s1]

# Comparative Structure-Based Virtual Screening Utilizing Optimized AlphaFold Model Identifies Selective HDAC11 Inhibitor

Fady Baselious <sup>1</sup>, Sebastian Hilscher <sup>1</sup>, Dina Robaa <sup>1</sup>, Cyril Barinka <sup>2</sup>, Mike Schutkowski <sup>3</sup> and Wolfgang Sippl <sup>1,\*</sup>

<sup>1</sup> Department of Medicinal Chemistry, Institute of Pharmacy, Martin-Luther-University of Halle-Wittenberg, 06120 Halle (Saale), Germany; f\_noshy@yahoo.com (F.B.); sebastian.hilscher@pharmazie.uni-halle.de (S.H.); dina.robaa@pharmazie.uni-halle.de (D.R.)

<sup>2</sup> Institute of Biotechnology of the Czech Academy of Sciences, BIOCEV, 252 50 Vestec, Czech Republic; cyril.barinka@ibt.cas.cz

<sup>3</sup> Charles Tanford Protein Center, Department of Enzymology, Institute of Biochemistry and Biotechnology, Martin-Luther-University of Halle-Wittenberg, 06120 Halle (Saale), Germany; mike.schutkowski@biochemtech.uni-halle.de

\* Correspondence: wolfgang.sippl@pharmazie.uni-halle.de

## Table of Content

| Table of contents |                                      |        |
|-------------------|--------------------------------------|--------|
|                   | Topic                                | Page   |
| 1                 | Structures of virtual screening hits | S2     |
| 2                 | Molecular dynamics results           | S3     |
| 3                 | Analytical data                      | S4-S8  |
| 4                 | In vitro data                        | S9-S10 |

**Table S1.** Virtual screening hits (7) obtained after excluding the bidentate poses in HDAC1, HDAC6 and HDAC8 as well as monodentate poses in HDAC6.

|   | Title            | Structure                                                                            |
|---|------------------|--------------------------------------------------------------------------------------|
| 1 | ZINC000028464438 | 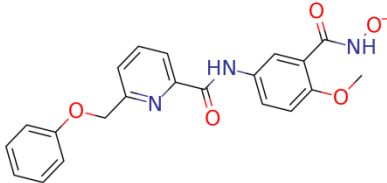   |
| 2 | ZINC000671998736 |    |
| 3 | ZINC000725337504 |    |
| 4 | ZINC000742823399 |   |
| 5 | ZINC000787867170 |  |
| 6 | ZINC000916666211 |  |
| 7 | ZINC000916666264 |  |

**Table S2.** Hydrogen bond occupancy (%) for three repeated 50 ns MD runs and one 500 ns MD run

|              | <b>His142</b> | <b>His143</b> | <b>His183</b> | <b>Tyr304</b> |
|--------------|---------------|---------------|---------------|---------------|
| <b>Run-1</b> | 100.0         | 65.7          | 34.5          | 87.0          |
| <b>Run-2</b> | 99.8          | 54.7          | 26.9          | 87.4          |
| <b>Run-3</b> | 100.0         | 72.7          | 37.3          | 72.3          |
| <b>500ns</b> | 100.0         | 68.1          | 42.6          | 85.0          |

## Analytical data

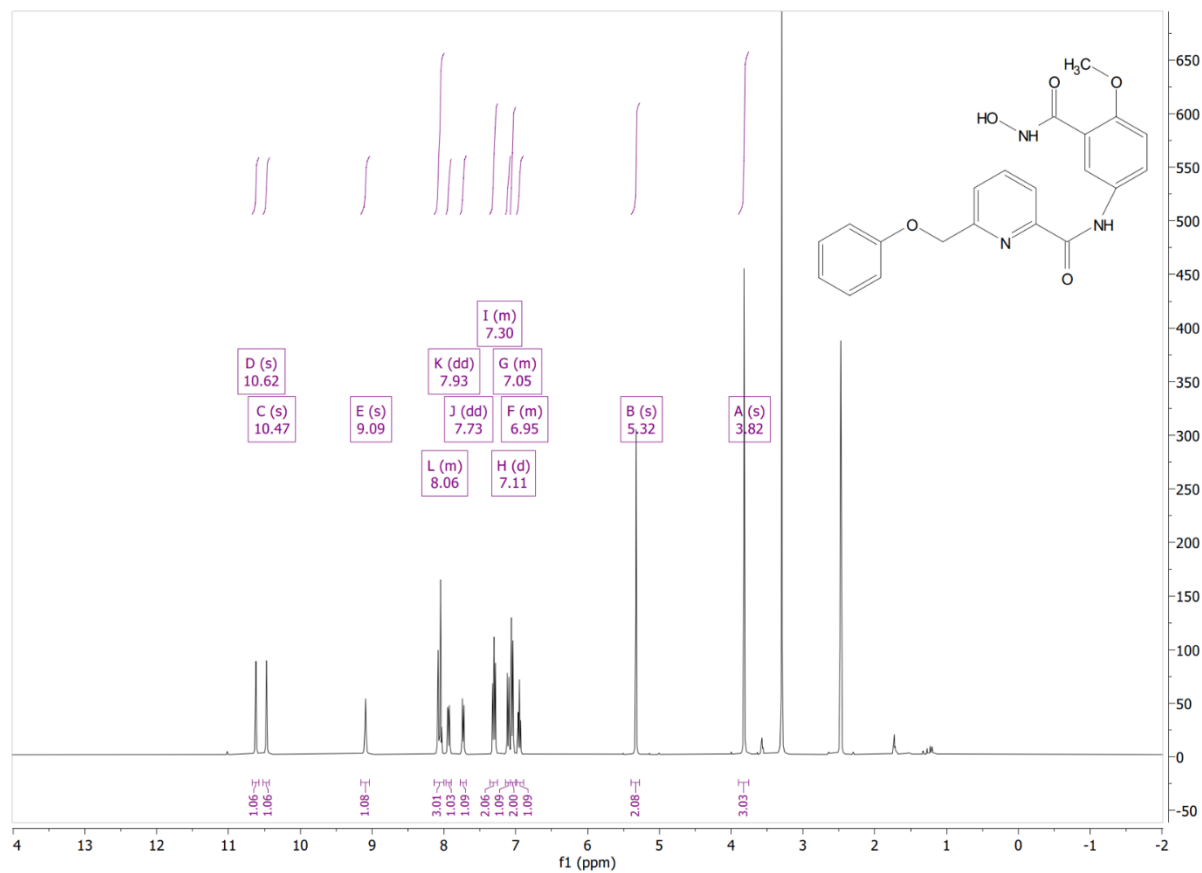

**Figure S1.** <sup>1</sup>H NMR chart of **1** (ZINC000028464438).

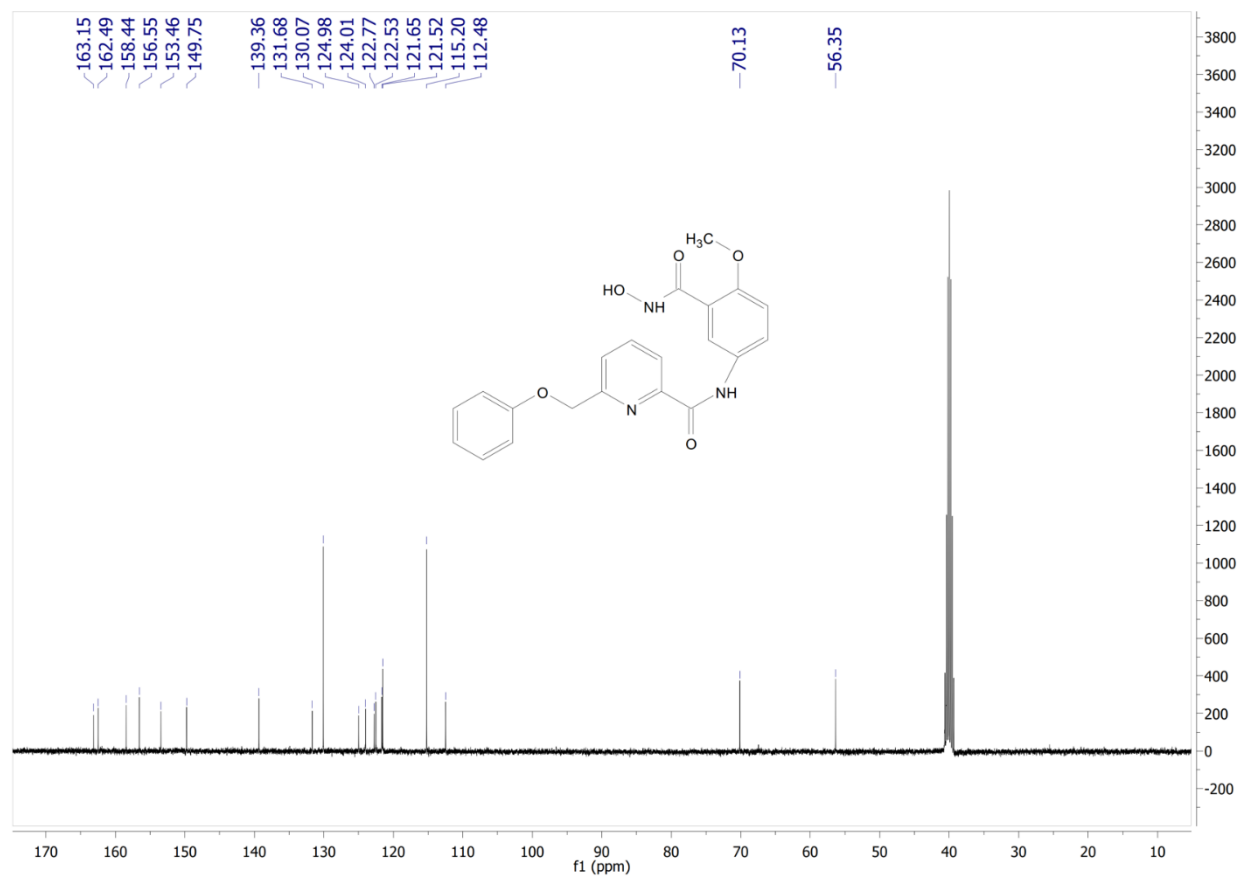

**Figure S2.** <sup>13</sup>C NMR chart of **1** (ZINC000028464438).

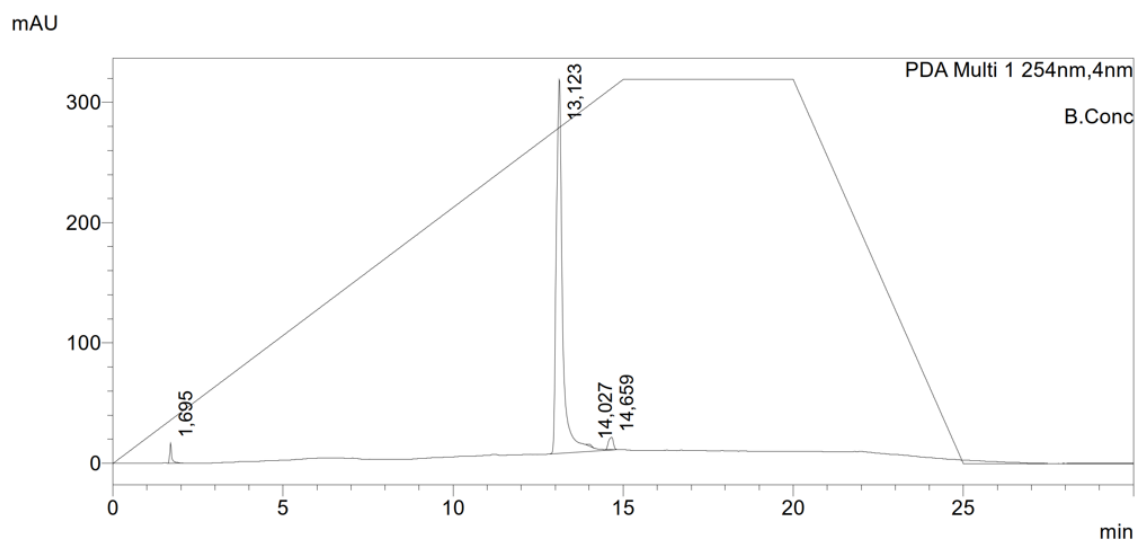

PDA Ch1 254nm

| Peak# | Ret. Time | Area    | Area%   | Tailing Factor | Resolution(USP) |
|-------|-----------|---------|---------|----------------|-----------------|
| 1     | 1,695     | 70031   | 1,668   | 1,812          | --              |
| 2     | 13,123    | 4021050 | 95,755  | 1,540          | 56,157          |
| 3     | 14,027    | 9999    | 0,238   | 0,882          | 3,439           |
| 4     | 14,659    | 98247   | 2,340   | 0,868          | 2,665           |
| Total |           | 4199327 | 100,000 |                |                 |

**Figure S3.** HPLC chromatogram of **1** (ZINC000028464438).

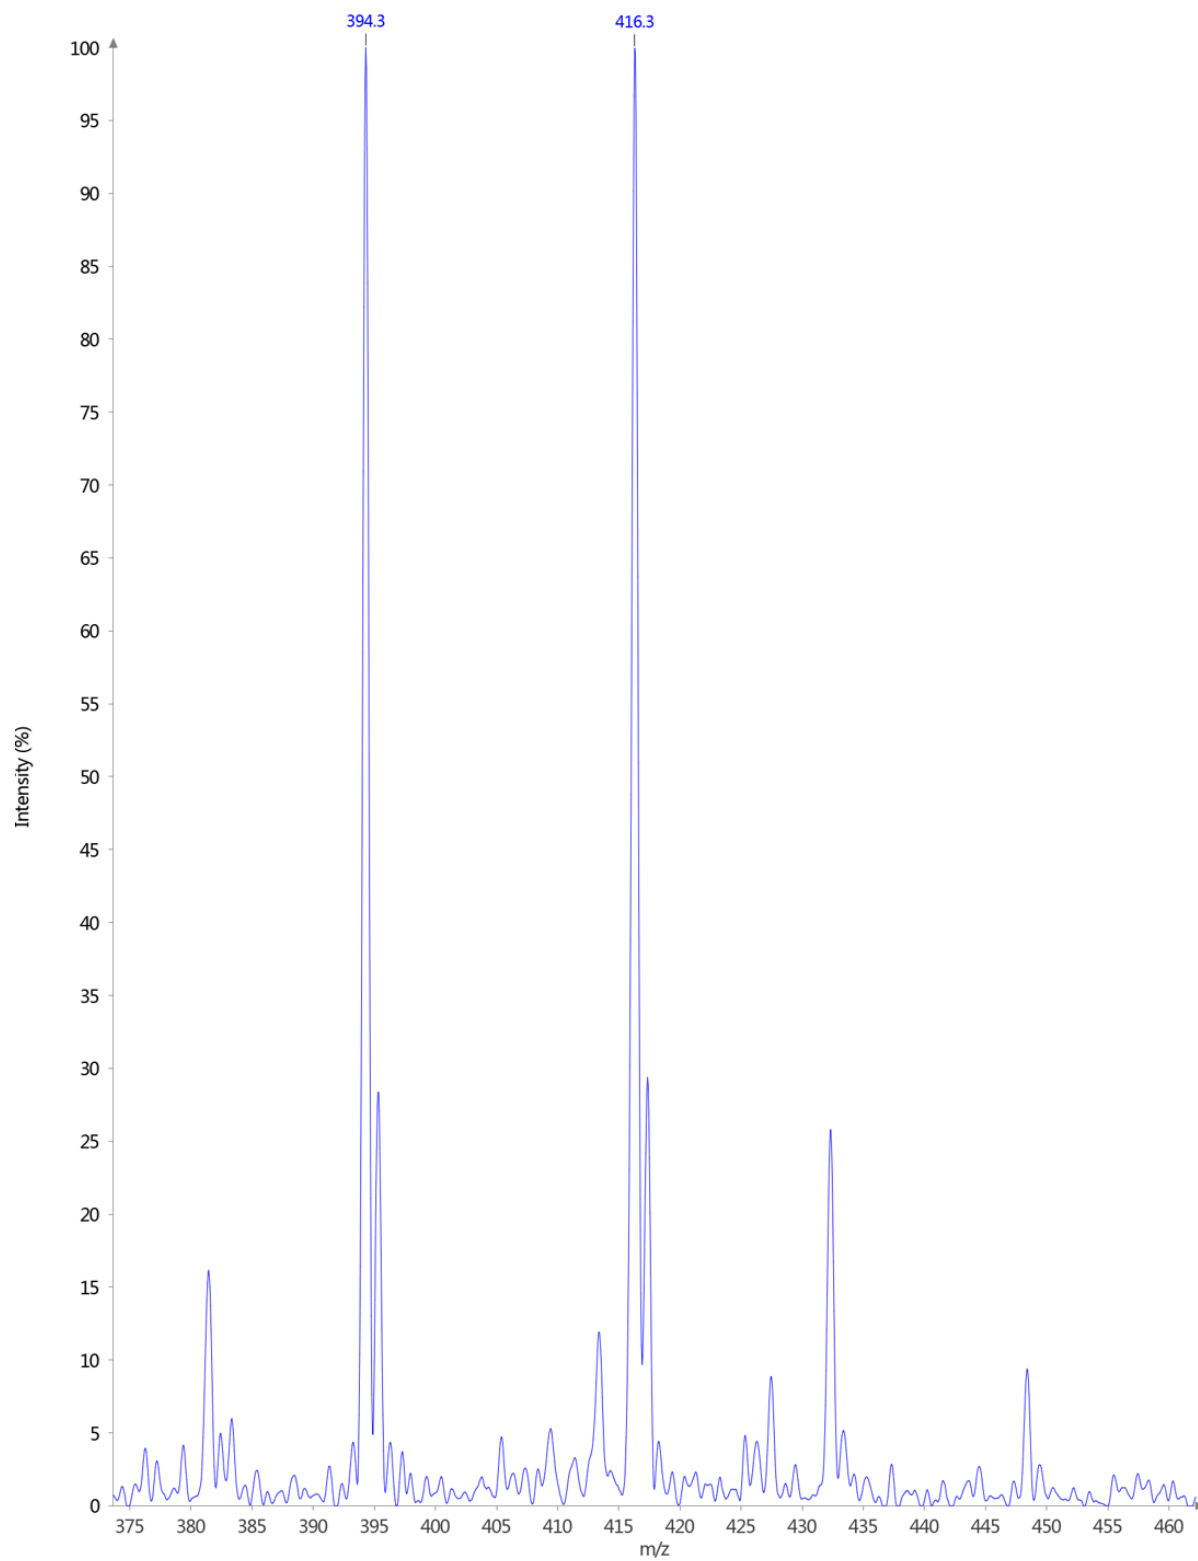

**Figure S4.** Mass spectrum of **1** (ZINC000028464438).

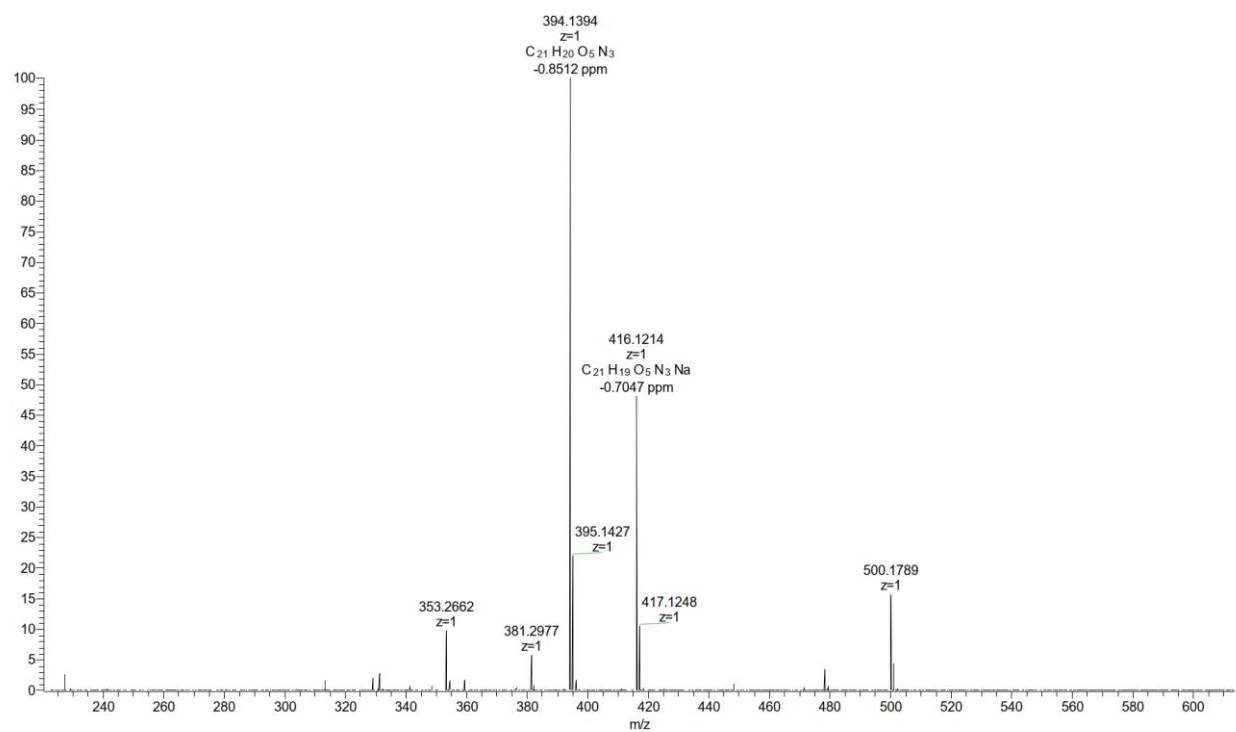

**Figure S5.** High resolution mass spectrum of **1** (ZINC000028464438).



## In vitro data

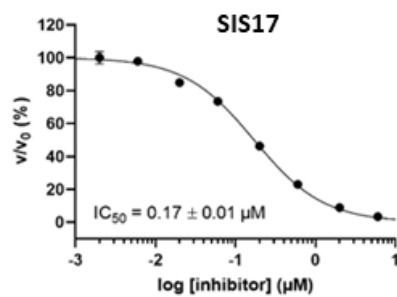

**Figure S6.**  $IC_{50}$  plot of the reference inhibitor SIS17 for HDAC11.

**Table S3.** Reference inhibitors used for the HDAC in vitro assay

| $IC_{50}$ $\mu M$ | HDAC1              | HDAC2             | HDAC3           | HDAC6              | HDAC8              | HDAC10             | HDAC11           |
|-------------------|--------------------|-------------------|-----------------|--------------------|--------------------|--------------------|------------------|
| SAHA              | $0.101 \pm 0.007$  | $0.43 \pm 0.009$  | $0.21 \pm 0.01$ | $0.100 \pm 0.01$   | $0.55 \pm 0.1$     | n.d.               | n.d.             |
| Entinostat        | $0.93 \pm 0.1$     | $0.95 \pm 0.03$   | $1.8 \pm 0.1$   | >20                | >20                | >20                | >20              |
| Nexturastat       | $0.50 \pm 0.030$   | n.d.              | n.d.            | $0.0035 \pm 0.001$ | $0.41 \pm 0.1$     | >10                | $3.25 \pm 0.2$   |
| PCI-34051         | $28.3 \pm 2.0$     | >20               | >20             | $48.2 \pm 6.2$     | $0.092 \pm 0.015$  | n.d.               | n.d.             |
| Tubastatin A      | $1.91 \pm 0.42$    | n.d.              | n.d.            | $0.034 \pm 0.001$  | $1.44 \pm 0.12$    | $0.22 \pm 0.02$    | n.d.             |
| SIS17             | 11.2% @ 10 $\mu M$ | 7.8% @ 10 $\mu M$ | 0% @ 10 $\mu M$ | 6.7% @ 10 $\mu M$  | 12.6% @ 10 $\mu M$ | 17.5% @ 10 $\mu M$ | $0.170 \pm 0.02$ |
